# Supplementary material for: The Missing Pieces: The Role of Secretion Systems in Campylobacter jejuni Virulence
Source: MDPI journal article supplement (doi:10.3390/biom13010135), 2023-01-09
Supplement: s1 [file s1]

**STable 3. *Campylobacter jejuni* relationship to *Helicobacter pylori* Cag T4SS genes.**

| Protein         | Function                                                                                          | <i>C. jejuni</i> strain 81-176 |                  |                   |                   | % Present in <i>Campylobacter</i> Genomes <sup>1</sup> |
|-----------------|---------------------------------------------------------------------------------------------------|--------------------------------|------------------|-------------------|-------------------|--------------------------------------------------------|
|                 |                                                                                                   | Protein Identity               | Protein Coverage | pTet              | pVir              |                                                        |
| CagZ/Cag1       | Membrane-associated protein; potential influence CagA translocation                               | 0%                             | 0%               | No Match          | No Match          | 0.00%                                                  |
| Cage/Cag2       |                                                                                                   | 0%                             | 0%               | No Match          | No Match          | 0.00%                                                  |
| Cagd/Cag3       | Outer membrane complex                                                                            | 0%                             | 0%               | No Match          | No Match          | 0.00%                                                  |
| Cagg/Cag4/VirB1 | Transglycosylase, peptidoglycan hydrolase, t-pilus formation                                      | 0%                             | 0%               | No Match          | No Match          | 0.00%                                                  |
| Cagb/Cag5/VirD4 | ATPase, coupling protein, recruitment of substrate to T4SS channel                                | 31.20%                         | 79.81%           | Cjj81176_pTet0040 | Cjj81176_pVir0007 | 32.62%                                                 |
| Caga/VirB11     | ATPase                                                                                            | 44.60%                         | 88.48%           | Cjj81176_pTet0039 | Cjj81176_pVir0005 | 33.35%                                                 |
| CagA            | Effector protein                                                                                  | 0%                             | 0%               | No Match          | No Match          | 0.00%                                                  |
| CagB            |                                                                                                   | 0%                             | 0%               | No Match          | No Match          | 0.00%                                                  |
| CagC            | Major subunit of extracellular pilus                                                              | 0%                             | 0%               | No Match          | No Match          | 0.00%                                                  |
| CagD            |                                                                                                   | 0%                             | 0%               | No Match          | No Match          | 0.00%                                                  |
| CagE            | ATPase                                                                                            | 31.40%                         | 82.60%           | Cjj81176_pTet0028 | Cjj81176_pVir0053 | 32.81%                                                 |
| CagF            | Secretion chaperone                                                                               | 0%                             | 0%               | No Match          | No Match          | 0.00%                                                  |
| CagG            |                                                                                                   | 0%                             | 0%               | No Match          | No Match          | 0.00%                                                  |
| CagH            |                                                                                                   | 0%                             | 0%               | No Match          | No Match          | 0.00%                                                  |
| CagI            |                                                                                                   | 0%                             | 0%               | No Match          | No Match          | 0.00%                                                  |
| CagL/VirB5      | Minor subunit of extracellular pilus, pilus tip adhesion, Integrin binding                        | 0%                             | 0%               | No Match          | No Match          | 0.00%                                                  |
| CagM            | Outer membrane complex                                                                            | 0%                             | 0%               | No Match          | No Match          | 0.00%                                                  |
| CagN            |                                                                                                   | 0%                             | 0%               | No Match          | No Match          | 0.00%                                                  |
| CagP            |                                                                                                   | 0%                             | 0%               | No Match          | No Match          | 0.00%                                                  |
| CagQ            |                                                                                                   | 0%                             | 0%               | No Match          | No Match          | 0.00%                                                  |
| CagS            |                                                                                                   | 0%                             | 0%               | No Match          | No Match          | 0.00%                                                  |
| CagT/VirB7      | Pore composition, Binds to VirB9 and stabilizes it                                                | 30.40%                         | 40.00%           | Cjj81176_pTet0041 | No Match          | 3.57%                                                  |
| CagU            |                                                                                                   | 0%                             | 0%               | No Match          | No Match          | 0.00%                                                  |
| CagV/VirB8      | Biopic membrane protein, core complex                                                             | 26.70%                         | 69.05%           | Cjj81176_pTet0036 | Cjj81176_pVir0001 | 24.21%                                                 |
| CagW/VirB9      | Polytopic membrane protein, stabilization of VirB5 and VirB3, inner membrane channel              | 0%                             | 0%               | No Match          | No Match          | 0.00%                                                  |
| CagX/VirB9      | Pore composition, intermolecular disulfide bridge with VirB7                                      | 27.0%                          | 44.15%           | Cjj81176_pTet0037 | Cjj81176_pVir0002 | 25.20%                                                 |
| CagY/VirB10     | Biopic membrane protein, Scaffolding of central pore channel. Pilus production. ATP energy sensor | 29.80%                         | 11.21%           | Cjj81176_pTet0038 | Cjj81176_pVir0003 | 32.51%                                                 |
| CagZ            | Cagb stabilization                                                                                | 0%                             | 0%               | No Match          | No Match          | 0.00%                                                  |

<sup>1</sup>Percentage of hits based on screening
