# Supplementary material for: The Missing Pieces: The Role of Secretion Systems in Campylobacter jejuni Virulence
Source: MDPI journal article supplement (doi:10.3390/biom13010135), 2023-01-09

**Figure S1.** Pie chart of Clusters of Orthologous Genes (COG) functional categories of *C. jejuni* flagellar type III secreted proteins predicted by the SIEVE algorithm. Only proteins that have the SIEVE scores of above 1.3 are considered for these categories. About 60% (n=34) of secreted proteins fall into known COG categories. At least seven proteins are involved in cell motility, five have a role in cell wall/membrane biogenesis, and four have a general function. Six proteins do not have any assigned COG categories. About 30% (n=17) of proteins do not have any assigned COG categories but have ENOG numbers EggNOG v6.0 in Uniprot database.

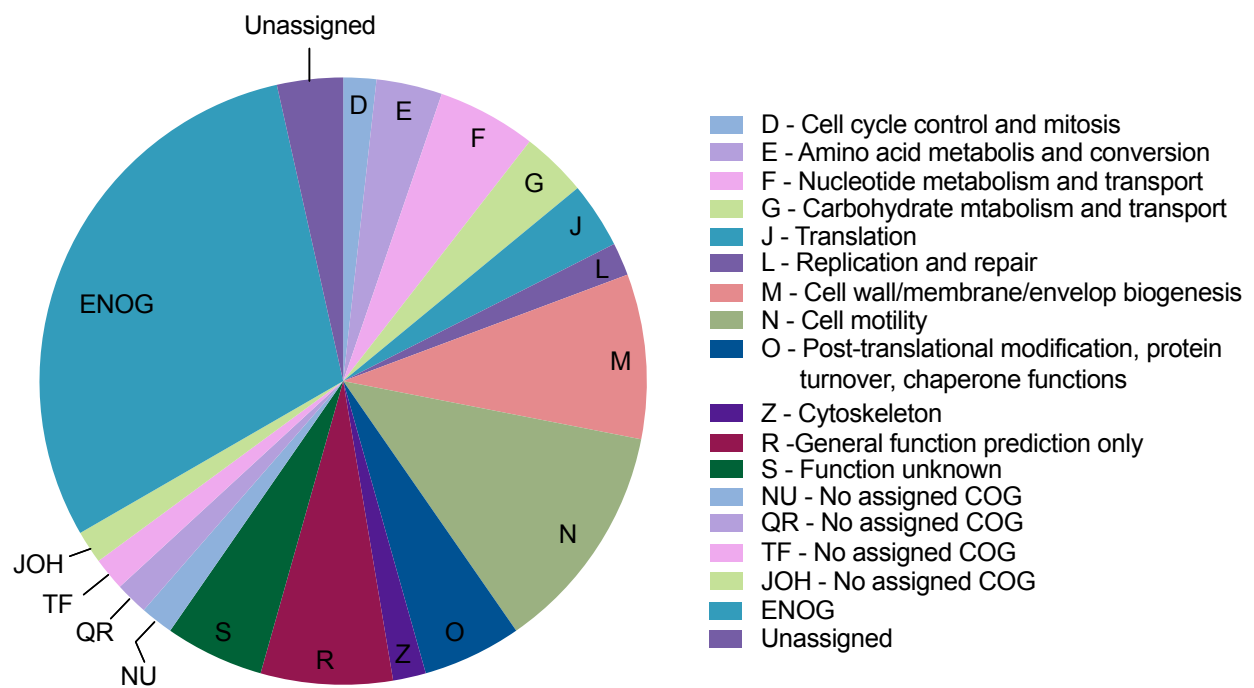

Supplement: s1 [file s1]
