# Supplementary material for: The Missing Pieces: The Role of Secretion Systems in Campylobacter jejuni Virulence
Source: MDPI journal article supplement (doi:10.3390/biom13010135), 2023-01-09
Supplement: s1 [file s1]

Supplemental Table S4. *Vibrio cholerae* T6SS structural genes and *C. jejuni* homologs

| <i>V. cholerae</i><br>T6SS Gene | T6SS Gene      | Function/Location                                                     | <i>C. jejuni</i> str. M129 |                     |              | % Present in<br><i>Campylobacter</i><br>Genomes <sup>1</sup> |
|---------------------------------|----------------|-----------------------------------------------------------------------|----------------------------|---------------------|--------------|--------------------------------------------------------------|
|                                 |                |                                                                       | Protein<br>Identity        | Protein<br>Coverage | Locus Tag    |                                                              |
| TssA                            | VasJ/ImpA      | Baseplate complex<br>recruiter, Polymerization of<br>TssD with sheath | 20.2%                      | 74.41%              | CJM129_4895  | 22.33%                                                       |
| TssB                            | VipA/ImpB      | Contractile sheath                                                    | 50.6%                      | 91.67%              | CJM129_4900  | 24.59%                                                       |
| TssC                            | VipB/ImpC      | Contractile sheath                                                    | 60.3%                      | 96.33%              | CJM129_4905  | 24.71%                                                       |
| TssD                            | Hcp            | Secreted tube, effector                                               | 63.3%                      | 67.67%              | CJM129_4875  | 24.84%                                                       |
| TssE                            | HsiF           | Baseplate complex                                                     | 24.2%                      | 62.76%              | CJM129_4910  | 24.38%                                                       |
| TssF                            | VasA/ImpG      | Baseplate complex                                                     | 30.4%                      | 96.77%              | CJM129_4915  | 24.25%                                                       |
| TssG                            | VasB/ImpH      | Baseplate complex                                                     | 26.2%                      | 92.31%              | CJM129_4920  | 23.77%                                                       |
| TssH                            | ClpV/VasG      | AAA+ATPase, sheath<br>recycling                                       | 40.9%                      | 69.74%              | CJM129_2355* | 99.74%*                                                      |
| TssI                            | VgrG           | Spike, effector                                                       | 24.0%                      | 48.12%              | CJM129_5040  | 26.78%                                                       |
| TssJ                            | VasD/Lip/SciN  | Membrane complex                                                      | 0.0%                       | 0.0%                | N/A          | 0.00%                                                        |
| TssK                            | VasE/ImpJ      | Baseplate                                                             | 24.4%                      | 98.42%              | CJM129_4885  | 23.74%                                                       |
| TssL                            | IcmH/DotU/VasF | Membrane complex                                                      | 29.7%                      | 31.86%              | CJM129_4880  | 23.80%                                                       |
| TssM                            | IcmF/VasK      | Membrane complex                                                      | 22.7%                      | 40.39%              | CJM129_4870  | 21.59%                                                       |
| TagD                            | PAAR           | Tip of spike                                                          | 0.0%                       | 0.0%                | N/A          | 0.06%                                                        |

\*Note: Hit is another ATPase (ClpB protein) not present in the CJIE3, but located elsewhere on the chromosome

<sup>1</sup>Percentage of matches based on screening PubMLST database
